# Supplementary material
Source: PubMed Central journal article supplement (PMC7129165)
Supplement: mmc1.pdf [file mmc1.pdf]

# THE LANCET

## Gastroenterology & Hepatology

### Supplementary appendix

Supplement to: Zhang C, Shi L, Wang F-S. Liver injury in COVID-19: management and challenges. *Lancet Gastroenterol Hepatol* 2020; published online March 4. [https://doi.org/10.1016/S2468-1253\(20\)30057-1](https://doi.org/10.1016/S2468-1253(20)30057-1).

This translation in Chinese was submitted by the authors and we reproduce it as supplied. It has not been peer reviewed. *The Lancet Gastroenterology and Hepatology's* editorial processes have only been applied to the original in English, which should serve as reference for this manuscript.

此简体中文译文由作者提交，我方按照提供的版本刊登。此译文并未经过同行审阅。医学期刊《柳叶刀》的编辑流程仅适用于英文原稿，英文原稿应作为此手稿的参考。

## 新型冠状病毒肺炎相关的肝损伤：诊治与挑战

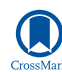

Lancet Gastroenterol Hepatol  
2020

Published Online  
March 4, 2020  
[https://doi.org/10.1016/S2468-1253\(20\)30057-1](https://doi.org/10.1016/S2468-1253(20)30057-1)

For WHO COVID-19 situation report 41 see [https://www.who.int/docs/default-source/coronaviruse/situation-reports/20200301-sitrep-41-covid-19.pdf?sfvrsn=6768306d\\_2](https://www.who.int/docs/default-source/coronaviruse/situation-reports/20200301-sitrep-41-covid-19.pdf?sfvrsn=6768306d_2)

2019年12月，中国武汉爆发了一种威胁全球人类健康的新型冠状病毒(也称严重急性呼吸综合征冠状病毒2 (SARS-CoV-2)，之前为2019-nCoV)。截止2020年3月1日，据世界卫生组织报告全球确诊的冠状病毒病 (COVID-19) 病例已达87 137例，主要爆发地为中国武汉。尽管COVID-19患者呈急性发作并且可自愈，但这种疾病也可致命，死亡率约为3%<sup>1</sup>。病情严重的患者可因大量肺泡损伤和进行性呼吸衰竭死亡<sup>2</sup>。

SARS-CoV-2与SARS-CoV的基因组序列相似度为82%，与中东呼吸综合征冠状病毒(MERS-CoV)的基因组序列同源为50%，这三种冠状病毒均可引起严重的呼吸系统疾病。据报道，60%以上的SARS患者存在肝功能损害<sup>3</sup>，而MERS-CoV感染的患者也被报道存在肝功能损害<sup>4</sup>。

目前为止，至少有7个相对大规模的病例研究报告了新型冠状病毒感染患者的临床特征<sup>1,5-10</sup>。结合解放军总医院第五医学中心的现有病例和数据，我们将在本文中讨论肝脏功能受新冠病毒感染的情况。数据表明，2-11%的新冠肺炎患者具有肝脏基础疾病，14-53%的进展期新冠肺炎患者丙氨酸转氨酶 (ALT) 和天冬氨酸转氨酶 (AST) 水平升高 (见表)。严重新冠肺炎患者的肝功异常发生率更高。Huang等<sup>5</sup>在《柳叶刀》杂志上报道了在重症监护室 (ICU) 中接受治疗的13名新冠肺炎患者，其中8名患者 (占比62%) AST升高，在28名不需要ICU监护治疗的对照组患者中，仅有7名患者 (占比25%) AST升高。此外，另一项大样本队列研究报告了来自31个省/市/自治区552家医院的1099名新冠肺炎患者，其中重症患者的转氨酶水平也高于非重症患者<sup>1</sup>。在另一项研究中，8名亚临床期新冠肺炎患者 (即临床症状出现之前) AST升高的发生率明显低于诊断明显的临床期患者<sup>8</sup>。因此，严重新冠肺炎患者的肝损伤较轻重患者更为普遍。

冠状病毒感染者肝损伤的直接原因可能是病毒感染了肝脏细胞。约2-10%的COVID-19患者出现腹泻症状，在其粪便和血液样本中检测到SARS-CoV-2的核酸<sup>11</sup>，这一发现提示病毒可能通过消化道或血液循环侵袭肝脏。SARS-CoV-2和SARS-CoV均通过与血管紧张素转换酶2 (ACE2) 受体结合进入靶细胞<sup>7</sup>，复制后感染上呼吸道和肺组织细胞，随后患者开始出现临床症状和体征。在SARS患者的病理学研究证实了病毒存在于肝组织中，但由于病毒滴度相对较低，并

未检测到病毒包涵体<sup>3</sup>。此外，MERS患者的肝组织中未检测到病毒颗粒<sup>4</sup>。现有的COVID-19病例研究尚未报道谷氨酰转氨酶 (Gamma-glutamyltransferase, GGT)，它是一种诊断胆管细胞损伤的生物标志物，我中心研究发现56例COVID-19患者住院期间有30例 (54%) 出现GGT升高 (未发表)。此外，56例患者中有1例 (1.8%) 在住院期间碱性磷酸酶 (alkaline phosphatase, ALP) 水平升高。一项初步研究 (未经同行评审) 表明，ACE2在胆管细胞上高表达<sup>12</sup>，这提示SARS-CoV-2可能直接与ACE2阳性的胆管细胞结合，从而导致肝功能失调。然而，我中心对一例COVID-19死亡患者肝组织的病理分析结果显示，其肝脏中并未发现病毒包涵体<sup>13</sup>。

肝损伤也可能是药物的肝脏毒性所致，这解释了不同队列研究中肝脏损伤的发生率存在的较大差异。此外，免疫介导的炎症，如细胞因子风暴和肺炎相关的缺氧，也可能导致COVID-19危重患者的肝损伤，甚至发展成肝衰竭。

轻度COVID-19患者的肝损伤通常是可逆的，无需任何特殊治疗即可自愈。当出现严重的肝损伤时，我们会给这些病人服用保肝药物。

表 新冠肺炎患者肝脏具有肝脏基础疾病和肝功能损伤情况

|                          | 新冠肺炎感染患者数 (目) | 具有肝病基础的感染患者数目 (百分比) | 具有肝功能异常表现的感染患者数目 (百分比)               | 备注                                                                                                                                                                                                                                    |
|--------------------------|---------------|---------------------|--------------------------------------|---------------------------------------------------------------------------------------------------------------------------------------------------------------------------------------------------------------------------------------|
| Guan et al <sup>1</sup>  | 1099          | 23 (2.3%)           | AST 异常升高 (22.2%)<br>ALT 异常升高 (21.3%) | 非重症患者中 AST 升高的比例为 18.2% (112/615)，而重症患者中 AST 升高的比例为 39.4% (56/142)。非重症患者中 ALT 升高的比例为 19.8% (120/606)，重症患者中 ALT 升高的比例为 28.1% (38/135)。重症患者肝功能异常的发生率明显更高。13 例在 ICU 接受治疗的患者中有 8 例 (62%) 表现为肝功能异常，28 例不需要 ICU 治疗的患者中有 7 例 (25%) 表现为肝功能异常。 |
| Huang et al <sup>5</sup> | 41            | 1 (2.0%)            | 15 (31.0%)                           | 一名患者表现为严重肝功能损伤。                                                                                                                                                                                                                       |
| Chen et al <sup>6</sup>  | 99            | NA                  | 43 (43.0%)                           | —                                                                                                                                                                                                                                     |
| Wang et al <sup>7</sup>  | 138           | 4 (2.9%)            | NA                                   | —                                                                                                                                                                                                                                     |
| Shi et al <sup>8</sup>   | 81            | 7 (8.6%)            | 43 (53.1%)                           | 经 CT 扫描确诊为亚临床期新冠肺炎患者 AST 升高的发生率明显低于诊断明显的临床期患者。                                                                                                                                                                                        |
| Xu et al <sup>9</sup>    | 62            | 7 (11.0%)           | 10 (16.1%)                           | —                                                                                                                                                                                                                                     |
| Yang et al <sup>10</sup> | 52            | NA                  | 15 (29.0%)                           | 生存患者的肝功异常率在存活 (30%) 和死亡患者间 (28%) 没有明显差异。                                                                                                                                                                                              |
| 我们的数据                    | 56            | 2 (3.6%)            | 16 (28.6%)                           | 一名死亡患者表现为明显肝损伤 <sup>13</sup> 。                                                                                                                                                                                                        |

慢性肝脏疾病已成为全球主要疾病负担之一。在中国约有三亿人患有肝脏疾病，如慢性病毒性肝炎、非酒精性脂肪肝、酒精肝等。由于患病人数众多，COVID-19感染对肝脏情况的潜在影响需要得到仔细研究。然而，在COVID-19的研究中，并未对患者的基础肝脏疾病状况进行仔细评估，也未研究基础肝脏疾病与COVID-19疾病进程之间的关系。对于COVID-19患者而言，免疫系统功能障碍，诸如低淋巴血症、CD4<sup>+</sup>T细胞数量降低、细胞因子水平异常（包括细胞因子风暴）等是很常见的症状，这些指标可能与疾病严重程度及患者死亡率密切相关。对处于免疫耐受期或长期接受核苷类似物治疗的慢乙肝患者，感染SARS-CoV-2后病毒持续复制与肝脏损伤之间的关系有待进一步研究。在同时患有自身免疫性肝病和COVID-19的患者中，使用糖皮质激素对疾病进程的影响仍不明确。鉴于ACE2受体在胆管细胞上也有表达，感染SARS-CoV-2是否会加剧原发性胆汁性胆管炎患者的胆汁郁积，或导致患者ALP及GGT增高等，都需要医生予以关注。此外，由于患有肝硬化或肝癌的患者免疫功能低下，他们可能对SARS-CoV-2更加易感。感染COVID-19对这些患者原发肝脏疾病的严重性、死亡率及并发症（继发感染、肝性脑病、上消化道出血、肝衰竭等）的影响还需要在更大的临床研究队列展开研究。

患有晚期肝脏疾病，特别是年长且存在其他合并症的患者，他们的免疫功能愈发低下。这些存在基础病的患者在感染COVID-19后需要密集监测临床指标，或针对患者情况制定个性化治疗方案。后续研究中需要对COVID-19感染导致肝脏损伤的原因，及肝脏相关基础疾病对COVID-19治疗效果及临床转归的影响多加关注。

我们声明没有利益冲突。

张超，石磊，\*王福生  
fswang302@163.com

中国人民解放军总医院第五医学中心，感染性疾病诊疗与研究中心，国家感染病临床研究中心，北京 100039，中国

- 1 Guan W-J, Ni Z-Y, Hu Y, et al. Clinical characteristics of 2019 novel coronavirus infection in China. *N Engl J Med* 2020; published online Feb 28. DOI:10.1056/NEJMoa2002032.
- 2 Wang F-S, Zhang C. What to do next to control the 2019-nCoV epidemic? *Lancet* 2020; **395**: 391-93.
- 3 Chau TN, Lee KC, Yao H, et al. SARS-associated viral hepatitis caused by a novel coronavirus: report of three cases. *Hepatology* 2004; **39**: 302-10.
- 4 Alsaad KO, Hajeer AH, Al Balwi M, et al. Histopathology of Middle East respiratory syndrome coronavirus (MERS-CoV) infection—clinicopathological and ultrastructural study. *Histopathology* 2018; **72**: 516-24.
- 5 Huang C, Wang Y, Li X, et al. Clinical features of patients infected with 2019 novel coronavirus in Wuhan, China. *Lancet* 2020; **395**: 497-506.
- 6 Chen N, Zhou M, Dong X, et al. Epidemiological and clinical characteristics of 99 cases of 2019 novel coronavirus pneumonia in Wuhan, China: a descriptive study. *Lancet* 2020; **395**: 507-13.
- 7 Wang D, Hu B, Hu C, et al. Clinical characteristics of 138 hospitalised patients with 2019 novel coronavirus-infected pneumonia in Wuhan, China. *JAMA* 2020; published online Feb 7. DOI:10.1001/jama.2020.1585.
- 8 Shi H, Han X, Jiang N, et al. Radiological findings from 81 patients with COVID-19 pneumonia in Wuhan, China: a descriptive study. *Lancet Infect Dis* 2020; published online Feb 24. DOI:10.1016/S1473-3099(20)30086-4.
- 9 Xu X-W, Wu X-X, Jiang X-G, et al. Clinical findings in a group of patients infected with the 2019 novel coronavirus (SARS-CoV-2) outside of Wuhan, China: retrospective case series. *BMJ* 2020; published online Feb 19. DOI:10.1136/bmj.m606.
- 10 Yang X, Yu Y, Xu J, et al. Clinical course and outcomes of critically ill patients with SARS-CoV-2 pneumonia in Wuhan, China: a single-centered, retrospective, observational study. *Lancet Respir Med* 2020; published online Feb 24. DOI:10.1016/S2213-2600(20)30079-5.
- 11 Yeo C, Kaushal S, Yeo D. Enteric involvement of coronaviruses: is faecal-oral transmission of SARS-CoV-2 possible? *Lancet Gastroenterol Hepatol* 2020; published online Feb 19. DOI:10.1016/S2468-1253(20)30048-0.
- 12 Chai X, Hu L, Zhang Y, et al. Specific ACE2 expression in cholangiocytes may cause liver damage after 2019-nCoV infection. *bioRxiv* 2020; published online Feb 4. <https://doi.org/10.1101/2020.02.03.931766> (preprint).
- 13 Xu Z, Shi L, Wang Y, et al. Pathological findings of COVID-19 associated with acute respiratory distress syndrome. *Lancet Respir Med* 2020; published online Feb 18. DOI:10.1016/S2213-2600(20)30076-X.
